# Supplementary material for: The Role of Different Indexes of Adiposity and Body Composition for the Identification of Metabolic Syndrome in Women with Obesity
Source: MDPI journal article supplement (doi:10.3390/jcm10091975), 2021-05-04
Supplement: s1 [file s1]

# Supplementary Materials

**Table S1.** ANOVA and Bonferroni-test for all subjects MetS +, subdivided for age group. Data are presented as mean±SD.

|                          | 18–44 Years (n = 466) | 45–54 Years (n = 390) | 55+ Years (n = 672) | ANOVA   | 18-44 vs 45-54 years | 18-44 vs 55+ Years | 45-54 vs 55+ Years |
|--------------------------|-----------------------|-----------------------|---------------------|---------|----------------------|--------------------|--------------------|
| SBP (mm/Hg)              | 127.04 ± 11.75        | 129.04 ± 12.82        | 132.25 ± 13.96      | <0.0001 | $p = 0.06$ ;         | $p < 0.05$         | $p < 0.05$         |
| DBP mm/Hg)               | 77.31 ± 8.08          | 77.39 ± 7.23          | 77.55 ± 7.37        | 0.9212  | $p = 0.87$ .         | $p = 0.60$         | $p = 0.73$         |
| TG (mg/dL)               | 161.48 ± 71.74        | 157.09 ± 70.13        | 150.41 ± 57.75      | 0.1072  | $p = 0.36$           | $p = 0.07$         | $p = 0.09$         |
| HDL-C (mg/dL)            | 42.14 ± 9.8           | 46.75 ± 10.03         | 48.68 ± 12.11       | <0.0001 | $p < 0.05$           | $p < 0.05$         | $p = 0.92$         |
| Glycemia (mg/dL)         | 89.97 ± 25.01         | 107.27 ± 32.33        | 114.92 ± 40.39      | <0.0001 | $p < 0.05$           | $p < 0.05$         | $p < 0.05$         |
| BMI (kg/m <sup>2</sup> ) | 43.9 ± 7.4            | 44.1 ± 6.3            | 43.8 ± 6.0          | 0.7851  | $p = 0.67$           | $p = 0.80$         | $p = 0.44$         |

Abbreviations: SBP: systolic blood pressure; DBP: diastolic blood pressure; TG: triglycerides; HDL-C: high-density lipoprotein cholesterol; BMI: body mass index.

**Table S2.** Pearson partial (age) correlation analysis between the different indices in all subjects, MetS- and MetS+ subjects.

| All Subjects, N = 1528    |       |       |       |       |       |       | MetS– Subjects, N = 611 |       |                   |                       |       |                       | MetS+ Subjects, N = 917 |       |       |       |       |       |
|---------------------------|-------|-------|-------|-------|-------|-------|-------------------------|-------|-------------------|-----------------------|-------|-----------------------|-------------------------|-------|-------|-------|-------|-------|
|                           | BMI   | WtHR  | FMI   | FFMI  | TMI   | BMFI  | BMI                     | WtHR  | FMI               | FFMI                  | TMI   | BMFI                  | BMI                     | WtHR  | FMI   | FFMI  | TMI   | BMFI  |
| BMI (kg/m <sup>2</sup> )  | 1     | 0.72* | 0.96* | 0.55* | 0.96* | 0.94* | 1                       | 0.63* | 0.95*             | 0.39*                 | 0.94* | 0.92*                 | 1                       | 0.77* | 0.96* | 0.62* | 0.96* | 0.95* |
| WtHR                      | 0.72* | 1     | 0.65* | 0.51* | 0.76* | 0.78* | 0.63*                   | 1     | 0.55*             | 0.38*                 | 0.69* | 0.72*                 | 0.77*                   | 1     | 0.72* | 0.55* | 0.80* | 0.81* |
| FMI (kg/m <sup>2</sup> )  | 0.96* | 0.65* | 1     | 0.27* | 0.87* | 0.97* | 0.95*                   | 0.55* | 1                 | 0.08 <sup>§</sup>     | 0.83* | 0.96*                 | 0.96*                   | 0.72* | 1     | 0.38* | 0.90* | 0.98* |
| FFMI (kg/m <sup>2</sup> ) | 0.55* | 0.51* | 0.27* | 1     | 0.64* | 0.33* | 0.39*                   | 0.38* | 0.08 <sup>§</sup> | 1                     | 0.54* | 0.12 <sup>&amp;</sup> | 0.62*                   | 0.55* | 0.38* | 1     | 0.68* | 0.41* |
| TMI (kg/m <sup>3</sup> )  | 0.96* | 0.76* | 0.87* | 0.64* | 1     | 0.86* | 0.94*                   | 0.69* | 0.83*             | 0.54*                 | 1     | 0.80*                 | 0.96*                   | 0.80* | 0.90* | 0.68* | 1     | 0.88* |
| BMFI (kg/m)               | 0.94* | 0.78* | 0.97* | 0.33* | 0.86* | 1     | 0.92*                   | 0.72* | 0.96*             | 0.12 <sup>&amp;</sup> | 0.80* | 1                     | 0.95*                   | 0.81* | 0.98* | 0.41* | 0.88* | 1     |

For significance: \* $p < 0.0001$ , <sup>&</sup> $p < 0.01$ , <sup>§</sup> $p = 0.056$ . Abbreviations: BMI: body mass index; WtHR: waist-to-height ratio; FMI: fat mass index; FFMI: fat-free mass index; TMI: tri-ponderal mass index; BMFI: body mass fat index.

**Table S3.** Area under ROC curves relating each anthropometric measure to clinical cutpoint, after adjusting for age.

|                           | Hypertension<br>(SBP > 130 mmHg and/or<br>DBP > 85 mmHg) | Hypertriglyceridemia<br>(> 150 mg/dL) | HypoHDL-C<br>(< 50 mg/dL) | Glycemia<br>(> 100 mg/dL) |
|---------------------------|----------------------------------------------------------|---------------------------------------|---------------------------|---------------------------|
| BMI (kg/m <sup>2</sup> )  | 0.80                                                     | 0.57                                  | 0.57                      | 0.70                      |
| BMFI (kg/m)               | 0.80                                                     | 0.57                                  | 0.58                      | 0.71                      |
| FMI (kg/m <sup>2</sup> )  | 0.80                                                     | 0.58                                  | 0.57                      | 0.70                      |
| FFMI (kg/m <sup>2</sup> ) | 0.79                                                     | 0.57                                  | 0.58                      | 0.70                      |
| WtHR                      | 0.80                                                     | 0.59                                  | 0.60                      | 0.72                      |
| TMI (kg/m <sup>3</sup> )  | 0.80                                                     | 0.57                                  | 0.57                      | 0.70                      |

Abbreviations: BMI: body mass index; BMFI: body mass fat index; FMI: fat mass index; FFMI: fat-free mass index; WtHR: waist-to-height ratio; TMI: tri-ponderal mass index.

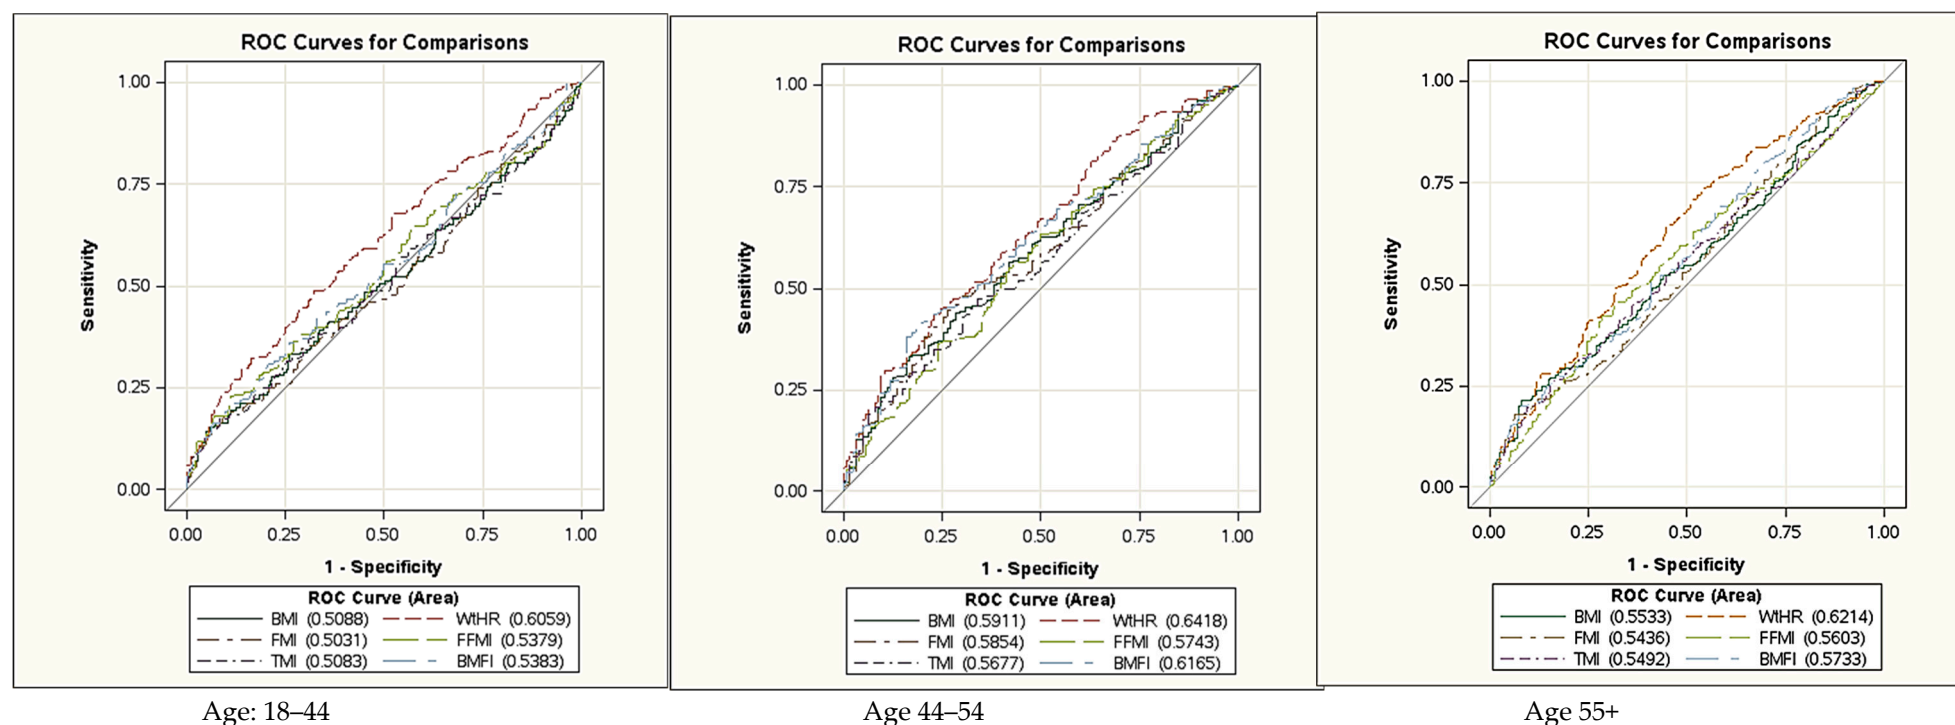

**Figure S1.** The ROC curves of the different indices subdivided according to the age range (18-44, 45-54, 55+ years). Area under the curve for the single index is reported in brackets.

Abbreviations: BMI: body mass index; WHtR: waist-to-height ratio; FMI: fat mass index; FFMI: fat-free mass index; TMI: tri-ponderal mass index; BMFI: body mass fat index.
